# Supplementary material for: Sumoylated HSP90 is a dominantly inherited plasma cell dyscrasias risk factor
Source: JCI journal article supplement (doi:10.1172/jci76802), 2014-12-07
Supplement: sd1 [file 1]

## **Supplementary Material**

## Supplementary Methods, Site-directed mutagenesis

### 1. Primers used for site-directed mutagenesis of HSP90:

HSP90\_K186R-s 5'-GTGATCCTCCATCTTAGAGAAGATCAGACAGAGTACC-3',  
HSP90\_K186R-as 5'-GGTACTCTGTCTGATCTTCTCTAAGATGGAGGATCAC-3',  
HSP90\_K438R-s 5'-GCATTCTCTAAAAATCTCAGGCTTGAATCCACGAAGAC-3',  
HSP90\_K438R-as 5'-GTCTTCGTGGATTCCAAGCCTGAGATTTTATAGAGAATGC-3',  
HSP90\_K559R-s 5'-GAAGAGAGCAAGGCAAGGTTTGAGAACCTCTGC-3',  
HSP90\_K559R-as 5'-GCAGAGGTTCTCAAACCTTGCCTTGCTCTCTTC-3',  
HSP90\_K685R-s 5'-CGCATCTATCGCATGATCAGGCTAGGTCTAGGTATT-3',  
HSP90\_K685R-as 5'-AATACCTAGACCTAGCCTGATCATGCGATAGATGCG-3'

### 2. Primers used for knock-down of SENP proteins:

|                 |                                                      |
|-----------------|------------------------------------------------------|
| SENP1-shRNA1-S  | 5'-GGATCCCCAATCCTTCCTCAGACAGTTTTTCAAGAGA-3'          |
| SENP1-shRNA1-AS | 5'-AAGCTTTTCCAAAAAATCCTTCCTCAGACAGTTTTTCTCTTGAA-3'   |
| SENP2-shRNA1-S  | 5'-GGATCCCCAACATGCTGAAACTGGGTAATTTCAAGAGA-3'         |
| SENP2-shRNA1-AS | 5'-AAGCTTTTCCAAAAAATCATGCTGAAACTGGGTAATTTCTCTTGAA-3' |
| SENP3-shRNA1-S  | 5'-GGATCCCCAAACTCCGTACCAAGGGTATTTCAAGAGA-3'          |
| SENP3-shRNA1-AS | 5'-AAGCTTTTCCAAAAAATCCTCGTACCAAGGGTATTTCTCTTGAA-3'   |
| SENP5-shRNA1-S  | 5'-GATCCCCAAGTCCACTGGTCTCTCATTATTCAAGAGA-3'          |
| SENP5-shRNA1-AS | 5'-AAGCTTTTCCAAAAAAGTCCACTGGTCTCTCATTATCTCTTGAA-3'   |

**Supplementary Table 1: Summary of paraproteins from patients positive for HSP90-SUMO reactivity**

| Paraprotein Type | Europeans  |                          | African-Americans |                          | Japanese   |                          |
|------------------|------------|--------------------------|-------------------|--------------------------|------------|--------------------------|
|                  | n          | Anti-HSP90-SUMO positive | n                 | Anti-HSP90-SUMO positive | n          | Anti-HSP90-SUMO positive |
| IgA              | 50         | 5 (18.5%)                | 12                | 2 (22.2%)                | 36         | 3 (33.3%)                |
| IgD              | 0          | 0                        | 0                 | 0                        | 11         | 0                        |
| IgG              | 128        | 17 (62.9%)               | 68                | 7 (77.7%)                | 129        | 6 (66.6%)                |
| IgG <sub>1</sub> |            | 2                        |                   | 3                        |            | 2                        |
| IgG <sub>2</sub> |            | 1                        |                   | 0                        |            | 1                        |
| IgG <sub>3</sub> |            | 14                       |                   | 4                        |            | 3                        |
| IgG <sub>4</sub> |            | 0                        |                   | 0                        |            | 0                        |
| IgM              | 48         | 5 (18.5%)                | 0                 | 0                        | 0          | 0                        |
| <b>Total</b>     | <b>226</b> | <b>27</b>                | <b>80</b>         | <b>9</b>                 | <b>176</b> | <b>9</b>                 |

**Supplementary Table 2: Detection of HSP90-SUMO carrier state in other malignancies of European patients.**

| <b>Malignancy</b>             |               |
|-------------------------------|---------------|
| AML/ALL                       | 0/64          |
| CLL                           | 0/50          |
| Follicular Lymphoma           | 0/50          |
| CML                           | 1/50          |
| Other hematological neoplasms | 0/112         |
| Colon-Ca                      | 1/50          |
| Mamma-Ca                      | 1/50          |
| Melanoma                      | 1/66          |
| Urological cancers            | 0/95          |
| (European healthy controls)   | (5/550; 0.9%) |

**Supplementary Table 3: Detection of HSP90-SUMO carrier state in autoimmune diseases.**

| <b>Autoimmune disorder</b>        |                     |
|-----------------------------------|---------------------|
| Rheumatoid Arthritis              | 0/100               |
| Systemic lupus erythematosus      | 0/30                |
| Polymyalgia rheumatica            | 1/15                |
| Granulomatosis with polyangiitis  | 0/10                |
| Multiple sclerosis                | 0/10                |
| Crohn`s disease                   | 0/10                |
| Churg-Strauss syndrome            | 0/5                 |
| SAPHO syndrome                    | 0/5                 |
| Sjögren`s syndrome                | 0/5                 |
| <b>Total autoimmune disorders</b> | <b>1/190 (0.5%)</b> |

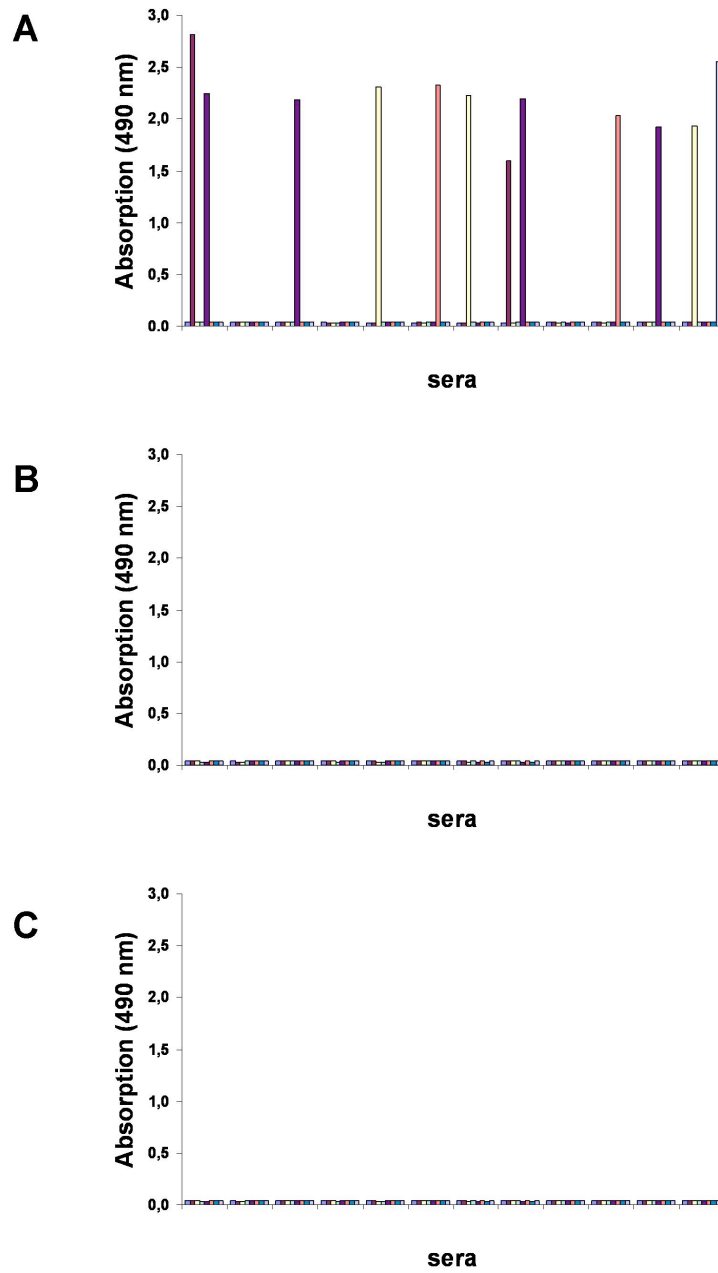

**Supplementary Figure 1: Reactivity of HSP90-SUMO, wtHSP90 or wtSUMO1 with paraproteins by ELISA.** Twelve of 96 paraprotein-containing sera reacted with (A) HSP90-SUMO at a dilution of  $1:10^6$ , but not with (B) wt-HSP90, or (C) wtSUMO1 (represented by VCP-SUMO1), respectively, at a dilution of  $1:10^2$ .

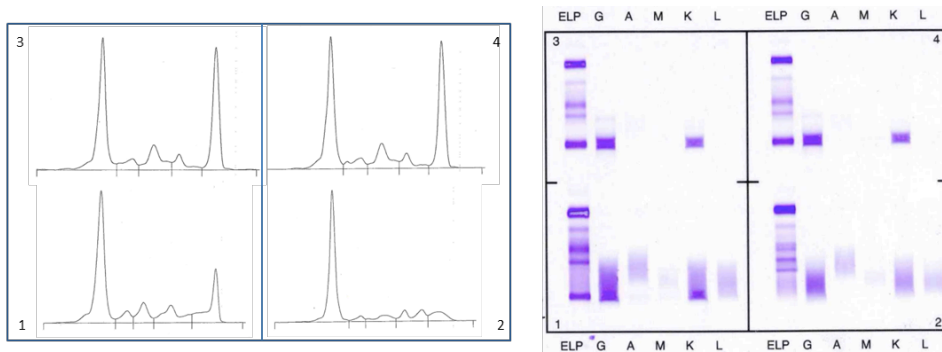

**Supplementary Figure 2: Depletion of paraprotein containing sera by a HSP90-SUMO affinity column.** Analysis was done by serum electrophoresis (left) and immunofixation (right). (1) Serum containing an IgG- $\kappa$  paraprotein with HSP90-SUMO reactivity and (2) absorption by a HSP90-SUMO column. (3) Serum containing an IgG- $\kappa$  paraprotein with non-HSP90-SUMO reactivity and (4) absorption by a HSP90-SUMO column (control). ELP: reference track.

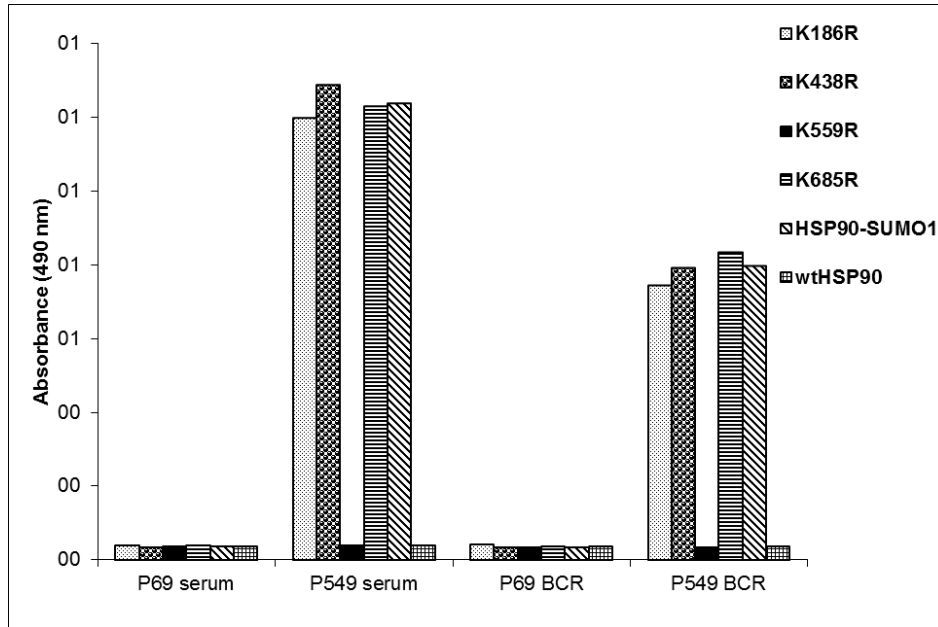

**Supplementary Figure 3: Patients paraprotein and BCR recognize the same HSP90 sumoylation site.** Elisa: Immunoreactivity of patient's serum or BCR versus mutagenized and sumoylated HSP90. Serum and BCR did not react with wtHSP90 or HSP90-SUMO (K559R), while all other mutations did not affect the immunoreactions. P549 represents a patient with a HSP90-SUMO specific paraprotein while P69 represents a paratarg-7 specific paraprotein.



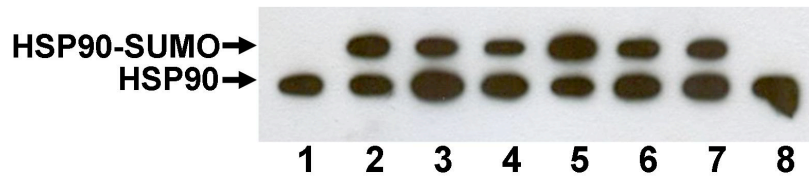

**Supplementary Figure 4: Expression of HSP90-SUMO in human blood cell fractions and mouth swabs.** Freshly drawn human blood was subjected to Ficoll centrifugation followed by MACS cell fractionation and lysed. Mouth line scrapings were lysed in SDS lysis buffer. Analysis was done by SDS-PAGE and Western blot analysis using anti-HSP90. 1: wtHSP90, 2: total blood, 3: erythrocytes, 4: granulocytes, 5: B cells, 6: T cells, 7: macrophages, 8: mouth swap.

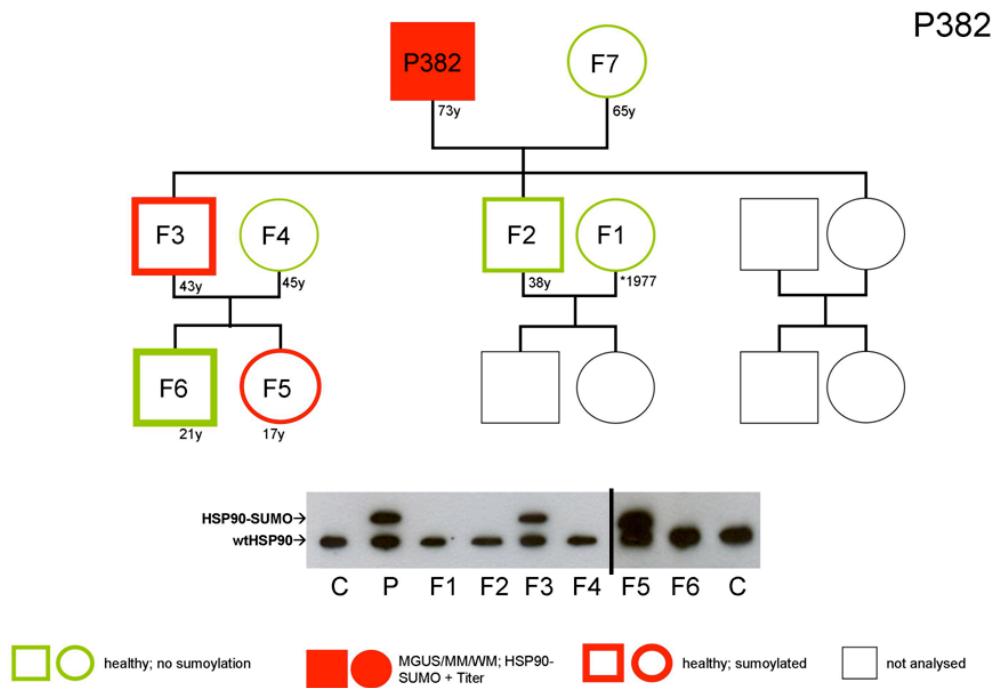

**Supplementary Figure 5: Pedigree of a family with an MM patient carrying HSP90-SUMO as paraprotein target.** Shown are the pedigree of the family and a Western blot analysis of HSP90 state. Sumoylated HSP90 was detected in one of his two sons (F3), while the other one (F2) carried wtHSP90; both being healthy. The son with HSP90-SUMO (F3) had two children (F5, F6), both healthy, but the daughter (F5) was carrier of HSP90-SUMO, while the son (F6) was not. P: patient #382, C: healthy blood donor as control.

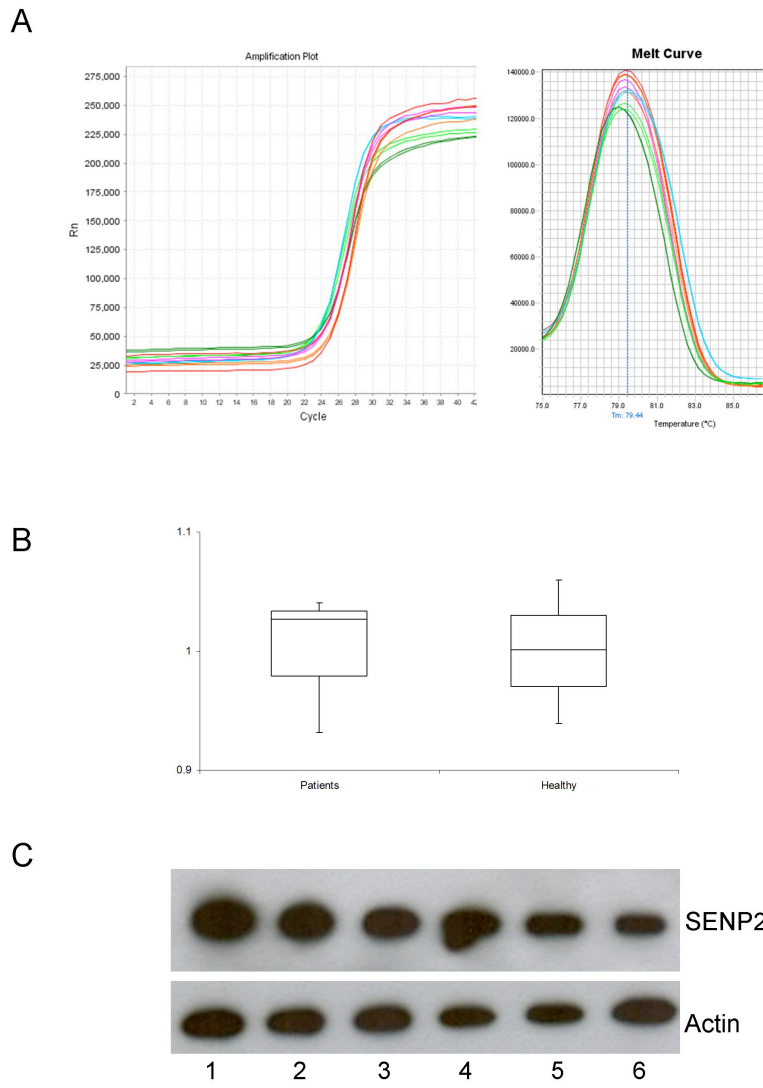

**Supplementary Figure 6: SENP2 expression in PBMCs derived from HSP90-SUMO carrying patients and healthy donors. A)** qRT-PCR of SENP2 in PBMCs (in replicates) derived from patients (n=3, red), healthy donors (n=3, green) and from a MM-patient with a paraprotein of other specificity (n=1, blue). Shown are raw amplification data and melting point analyses. **B)** Box plot of qRT-PCR data normalized to 18s RNA; mean value of the expression in healthy people is set to 1. Patients: HSP90-SUMO carrying patients, Healthy: 2 healthy donors and 1 MM patient with a paraprotein of different specificity. **C)** Western blot analysis followed by immunodetection with anti-SENP2 or anti-actin. 1-3: healthy donors, 4-6: HSP90-SUMO positive patients.

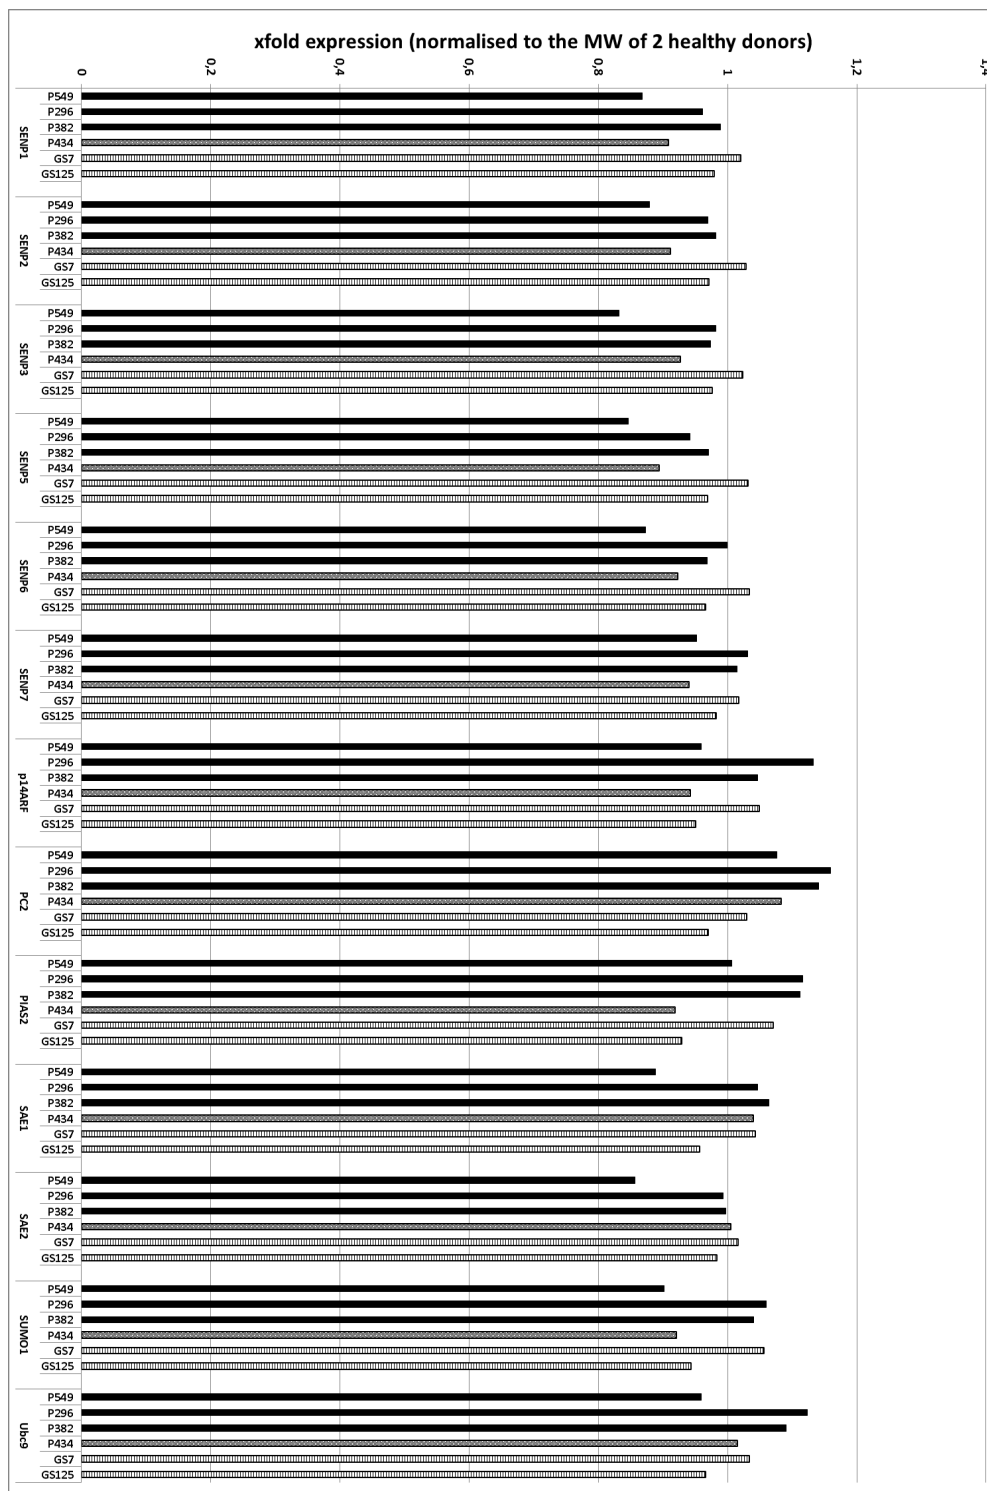

**Supplementary Figure 7: Relative expression of enzymes involved in sumoylation.** Data were obtained by qRT-PCR. Gene-specific amplification was performed on cDNA derived from peripheral blood of individual donors. Gene specific expression was normalized to the MW of specific gene expression in 2 healthy donors. P296, P382, P549: MM patients with a

HSP90-SUMO specific paraprotein, P434: MGUS patient with a paraprotein of unknown specificity, GS7, GS125: healthy donors.
